# Supplementary material for: Evidence of a causal effect of genetic tendency to gain muscle mass on uterine leiomyomata
Source: PubMed Central journal article supplement (PMC9892568; doi:10.1038/s41467-023-35974-7), 2023-02-01
Supplement: 41467_2023_35974_MOESM2_ESM.pdf [file 41467_2023_35974_MOESM2_ESM.pdf]

## Description of Additional Supplementary Files

**Supplementary Data 1:** Source Data File

**Supplementary Data 2:** Meta-analysis summary statistics from META-1 (limited to the top 10,000 variants from the previous UL meta-GWAS)

**Supplementary Data 3:** Meta-analysis summary statistics from META-2 (limited to the top 10,000 variants)

**Supplementary Data 4:** Results of colocalization of UL association signals and gene expression in GTEx v8 (cultured fibroblasts, skeletal muscle, uterus, and whole blood)

**Supplementary Data 5:** Results of SMR to test if gene expression mediates UL association (uterus)

**Supplementary Data 6:** Results of SMR to test if gene expression mediates UL association (whole blood)

**Supplementary Data 7:** Results of SMR to test if gene expression mediates UL association (skeletal muscle)

**Supplementary Data 8:** Results of SMR to test if gene expression mediates UL association (cultured fibroblasts)
